# Supplementary material for: Pest-YOLO: A model for large-scale multi-class dense and tiny pest detection and counting
Source: Frontiers journal article supplement (doi:10.3389/fpls.2022.973985), 2022-10-25
Supplement: Image_9.pdf [file Image_9.pdf]

## *Supplementary Material*

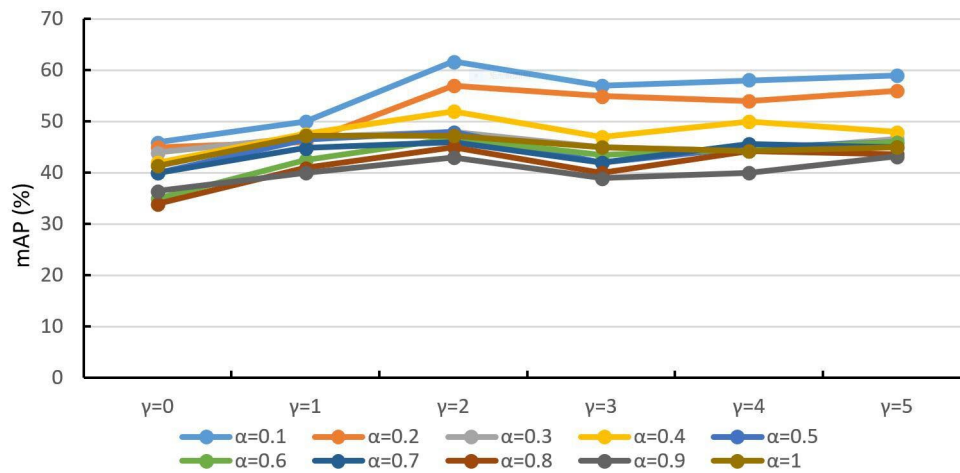

**Supplementary Figure 1.** Improving the effect of hyperparameters in the confidence loss function on mAP.
